# Supplementary material for: Improved thrombin binding aptamer analogues containing inversion of polarity sites: structural effects of extra-residues at the ends
Source: Royal Society of Chemistry journal article supplement (doi:10.1039/c6ob00931j), 2016-01-01
Supplement: c6ob00931j1.pdf [file c6ob00931j1.pdf]

## ELECTRONIC SUPPLEMENTARY INFORMATION

### IMPROVED THROMBIN BINDING APTAMER ANALOGUES CONTAINING INVERSION OF POLARITY SITES: STRUCTURAL EFFECTS OF EXTRA-RESIDUES AT THE ENDS

A. Virgilio,<sup>a</sup> T. Amato,<sup>a</sup> L. Petraccone,<sup>b</sup> R. Filosa,<sup>c</sup> M. Varra,<sup>a</sup> L. Mayol,<sup>a</sup> V. Esposito<sup>a\*</sup> and A. Galeone<sup>a\*</sup>

<sup>a</sup> Department of Pharmacy, University of Naples Federico II, via D. Montesano, 49, 80131 Naples, Italy. E-mail: [galeone@unina.it](mailto:galeone@unina.it), Tel: +39 081678542; [verespos@unina.it](mailto:verespos@unina.it), Tel: +39 081678746.

<sup>b</sup> Department of Chemical Sciences, University of Naples Federico II, via Cintia, I-80126 Naples, Italy

<sup>c</sup> Department of Experimental Medicine, Second University of Naples, via Costantinopoli 16, 80138 Naples, Italy

\*Corresponding Authors

[galeone@unina.it](mailto:galeone@unina.it)

[verespos@unina.it](mailto:verespos@unina.it)

- <sup>1</sup>H-NMR SPECTRA
- NOESY SPECTRA
- CD and CD melting profiles
- PAGE
- HPLC traces
- <sup>1</sup>H-NMR ASSIGNMENTS
- THERMODYNAMIC PARAMETERS

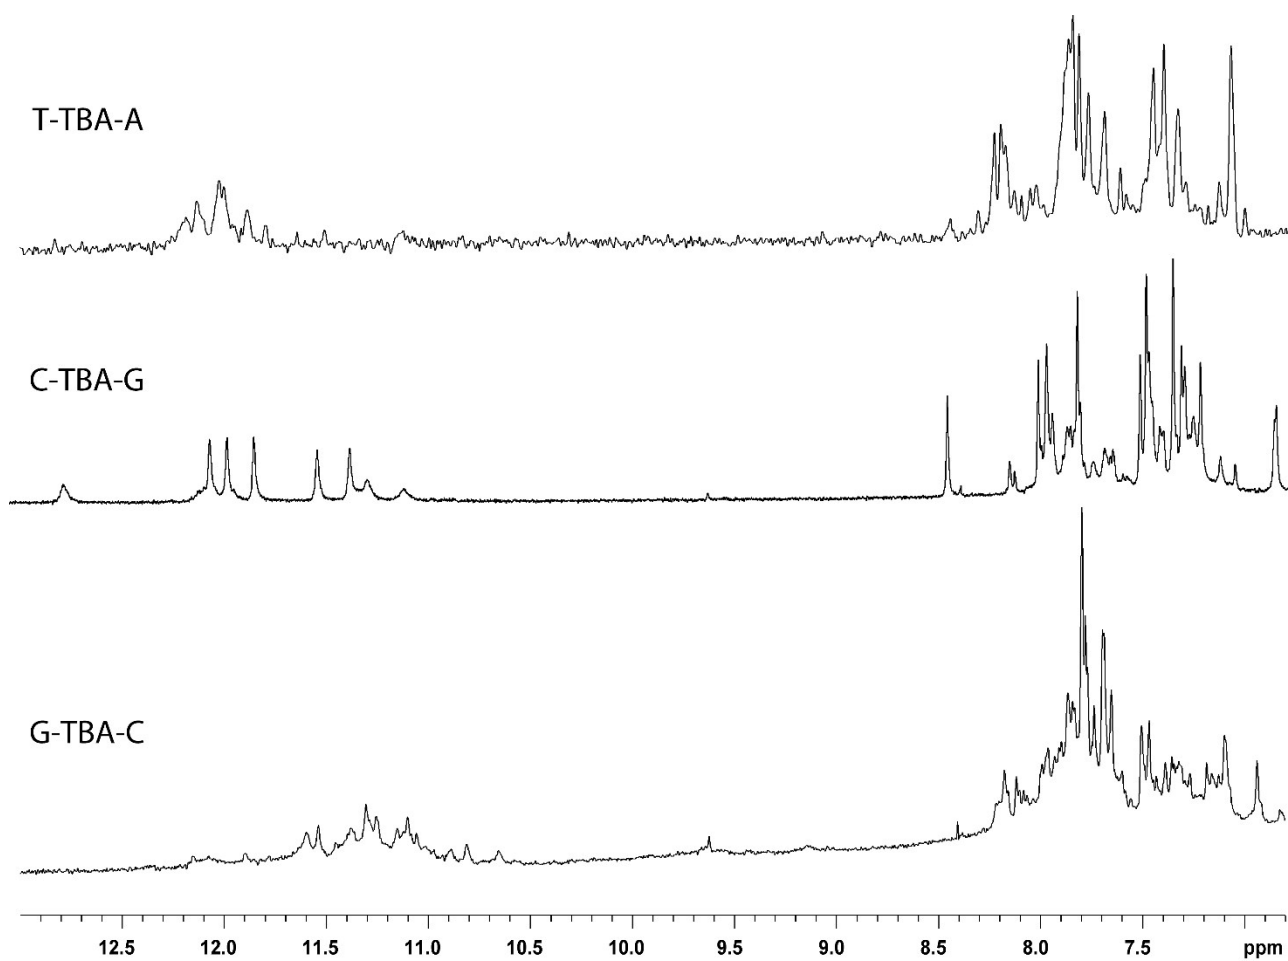

**Fig. S1.** Aromatic and imino proton regions of the <sup>1</sup>H-NMR spectra (700 MHz, T = 25°C) of the TBA analogues T-TBA-A, C-TBA-G and G-TBA-C in PBS buffer solution and 0.2 mM EDTA (pH 7.0).

# TBA-T

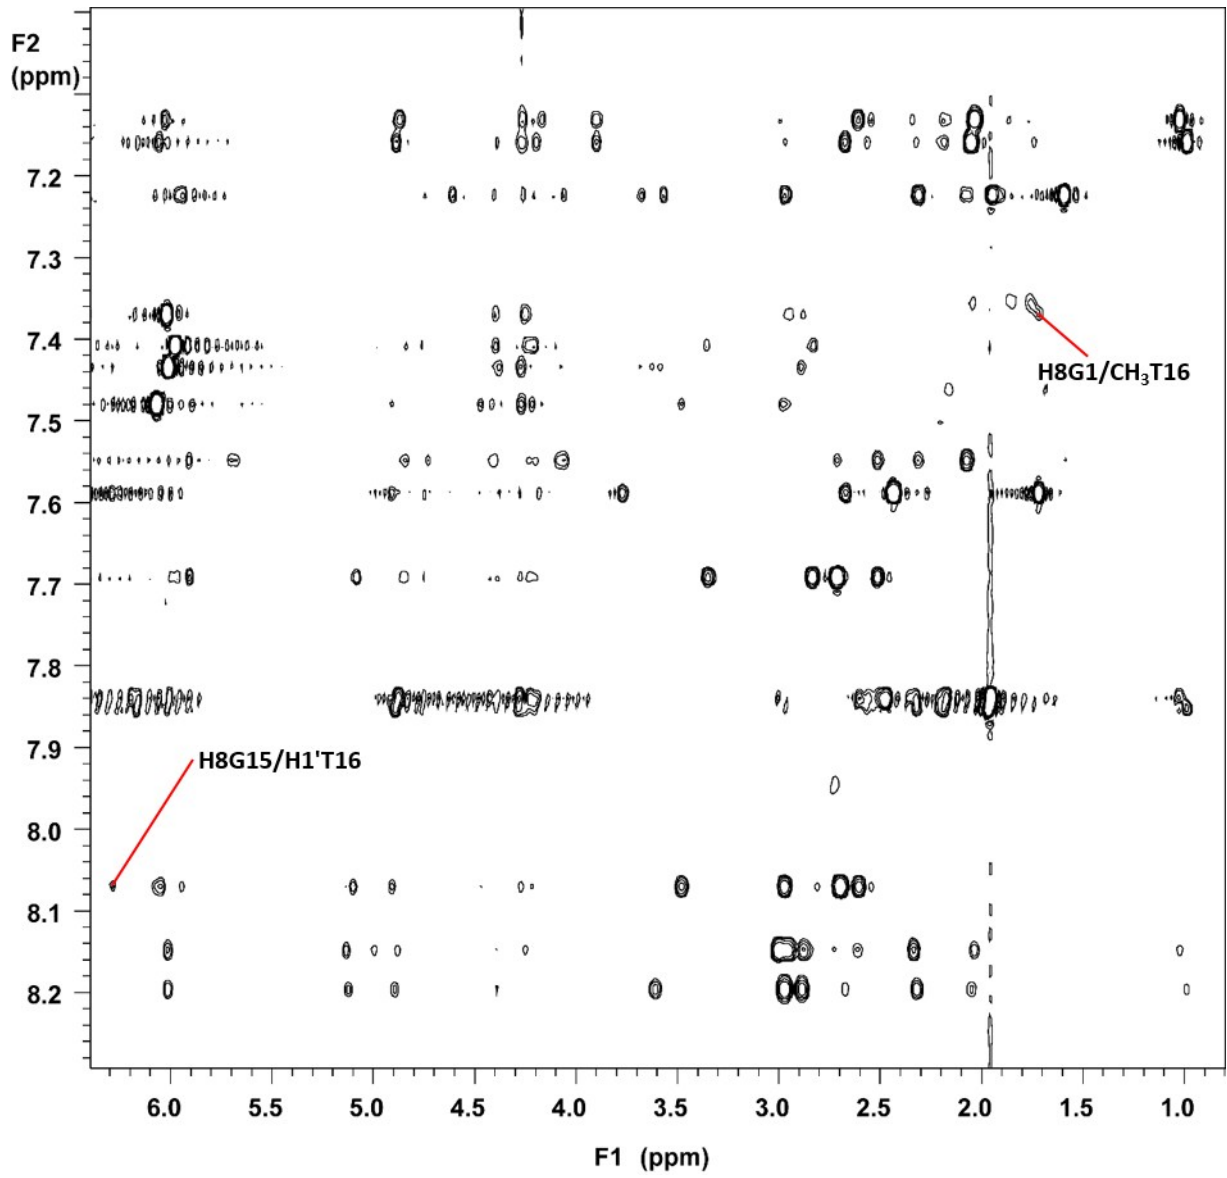

# TBA-C

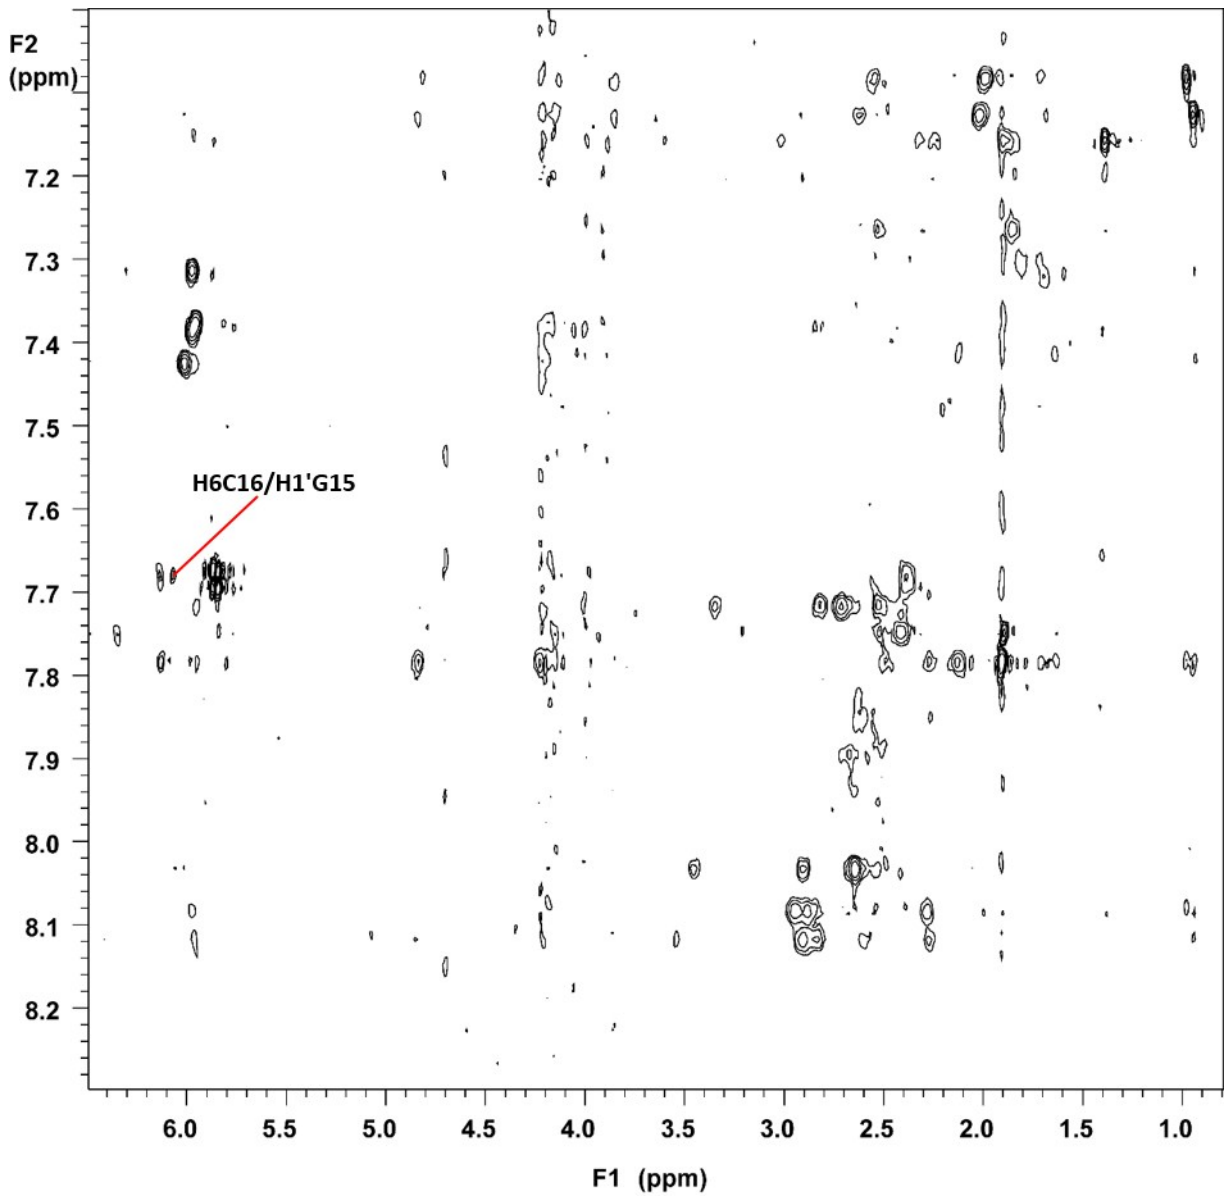

# TBA-G

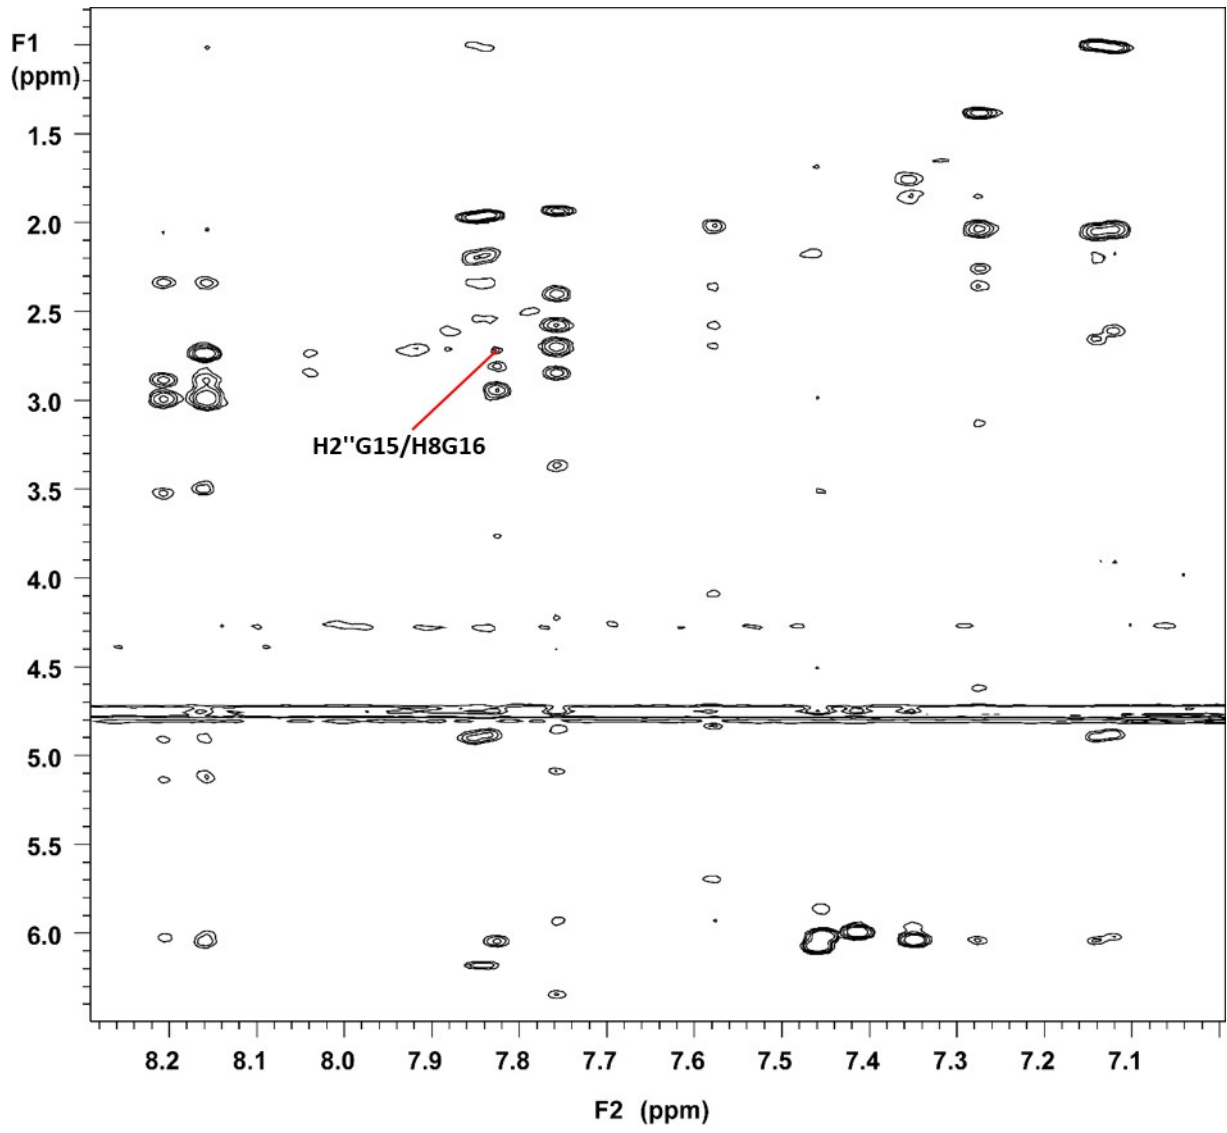

## A-TBA-T

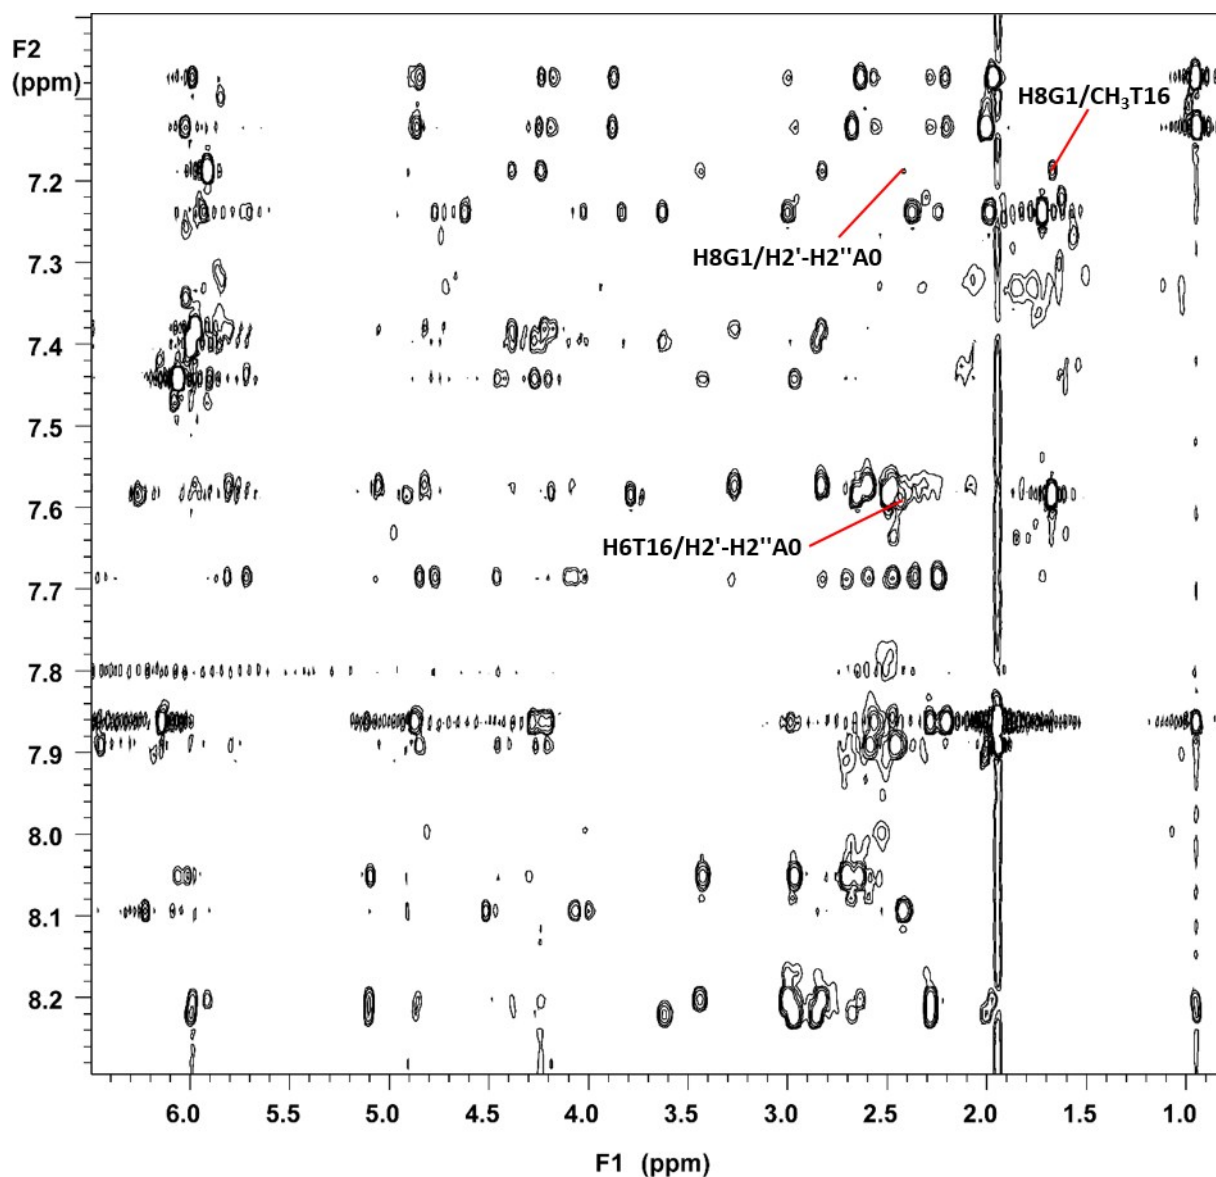

**Fig. S2.** Expanded region of 2D NOESY spectra of TBA-T, TBA-C, TBA-G and A-TBA-T (700 MHz; 25°C; strand concentration 2 mM in PBS buffer solution (H<sub>2</sub>O/D<sub>2</sub>O 9:1) and 0.2 mM EDTA (pH 7.0); total volume 0.6 ml; mixing time 180 ms) correlating bases H8/H6 and anomeric with sugar protons. The NOEs involving the extra-residue are labelled.

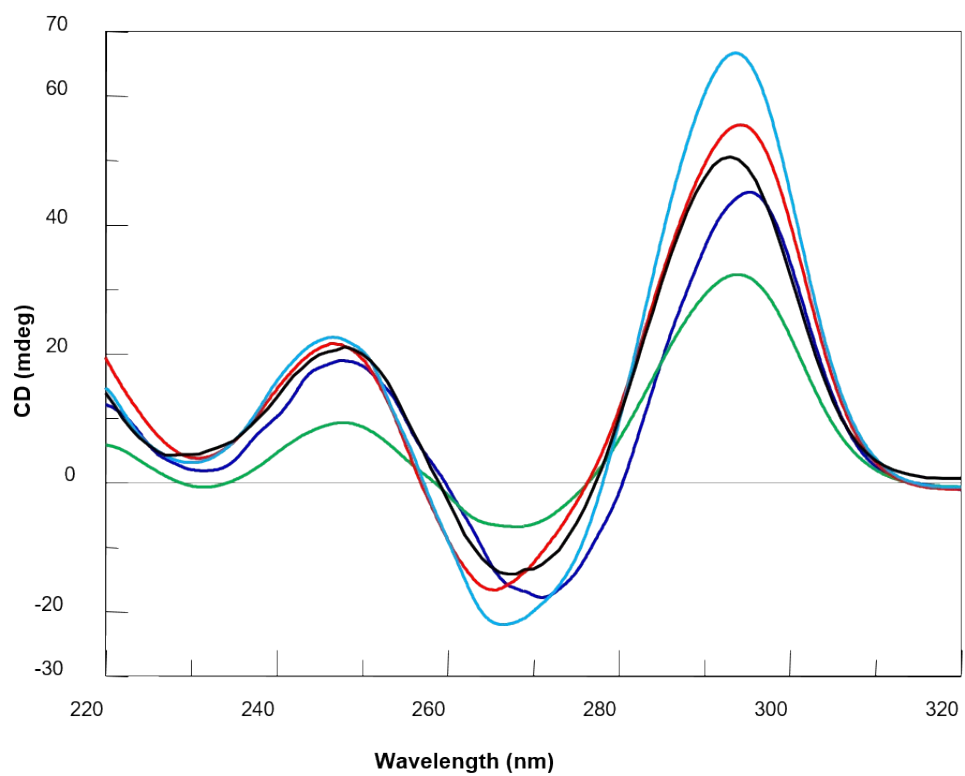

**Fig. S3.** CD spectra at 20°C (buffer solution 10 mM  $\text{KH}_2\text{PO}_4/\text{K}_2\text{HPO}_4$ , 70 mM KCl, pH 7.0) of TBA (black), TBA-G (red), TBA-A (dark blue), TBA-C (light blue), TBA-T (green).

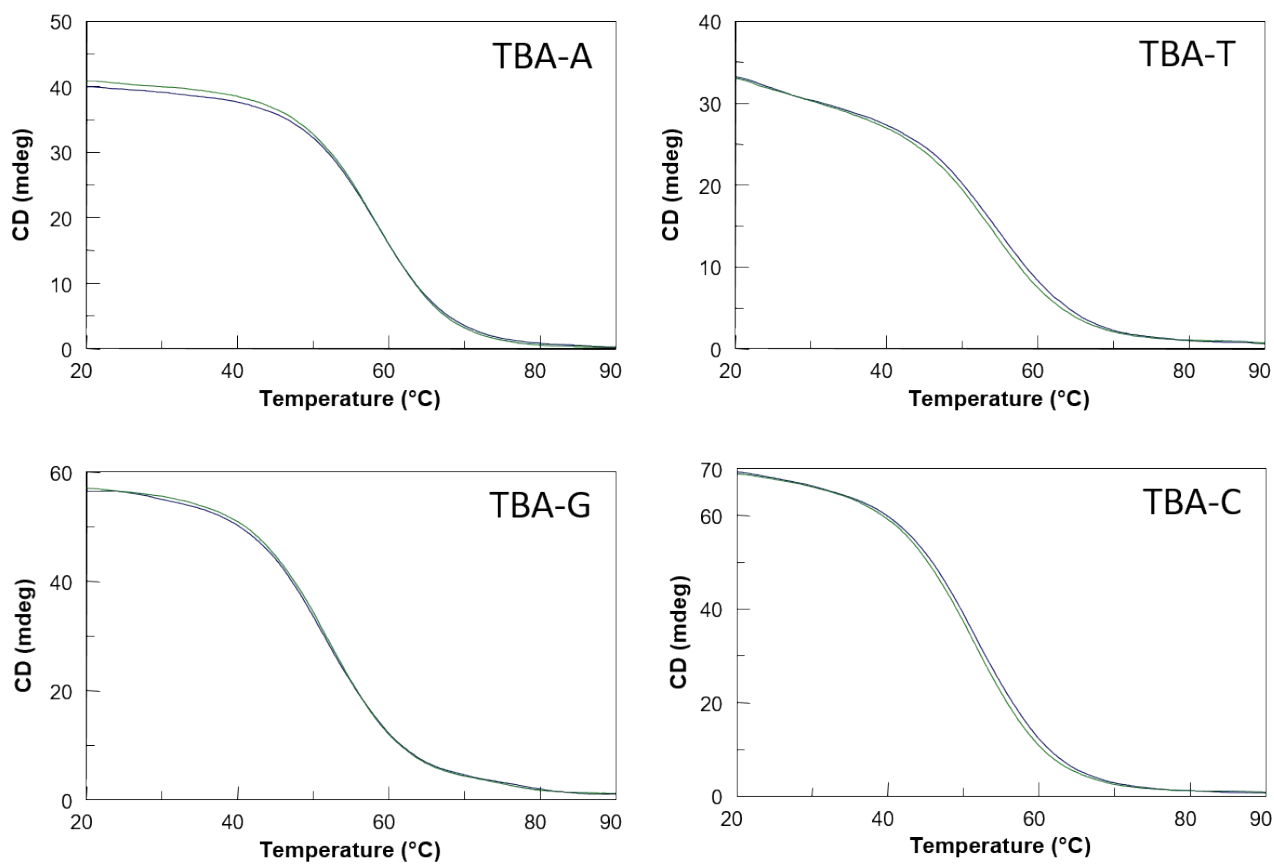

**Fig. S4.** CD melting (blue) and annealing (green) curves of modified TBAs registered as a function of temperature (range: 20-90°C) for all G-quadruplexes at their maximum Cotton effect wavelengths (294-295 nm). The CD data were recorded in a 0.1 cm pathlength cuvette at 100  $\mu$ M ODN strand concentration in a buffer solution 10 mM  $\text{KH}_2\text{PO}_4/\text{K}_2\text{HPO}_4$ , 70 mM KCl (pH 7.0), with a scan rate of 0.5°C/min.



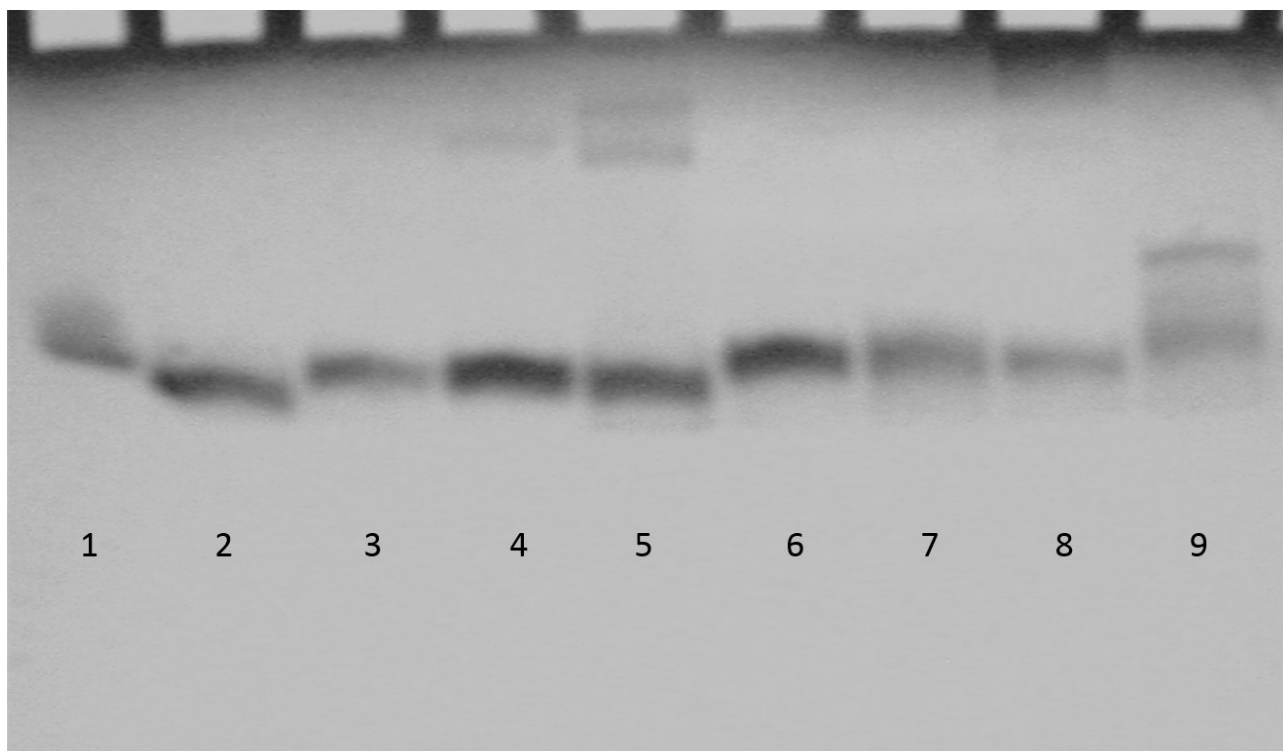

**Fig. S5.** Polyacrylamide non-denaturing gel electrophoresis of the TBA analogues and their natural counterpart. See Table 1 and the main text for details and experimental procedures. Lane 1: TBA; lane 2: TBA-A; lane 3: TBA-G; lane 4: TBA-T; lane 5: TBA-C; lane 6: A-TBA-T; lane 7: T-TBA-A; lane 8: C-TBA-G; lane 9: G-TBA-C.

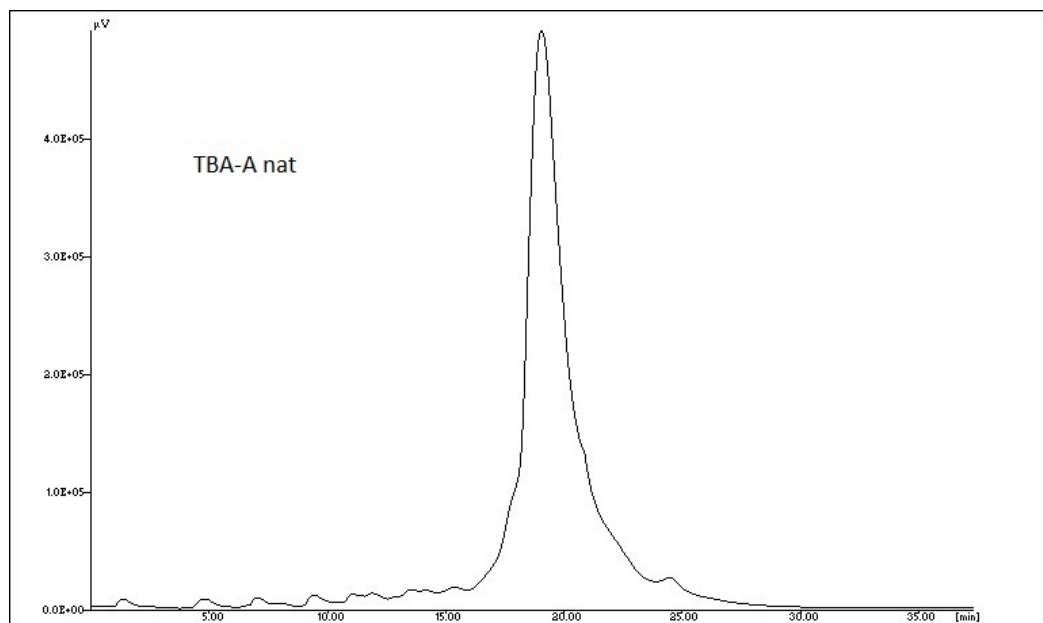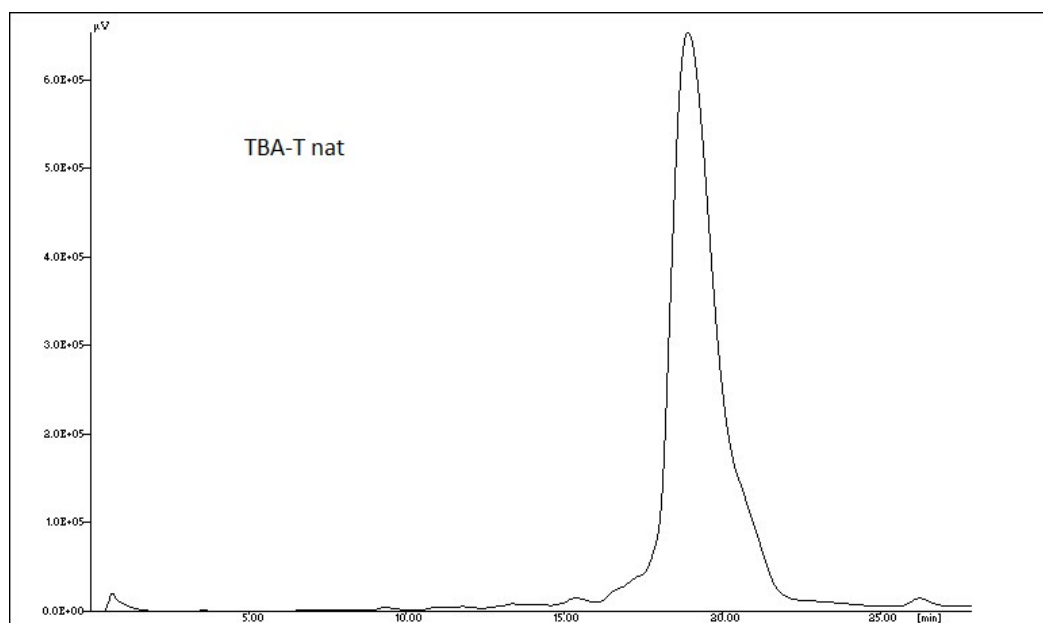

**Fig. S6.** HPLC chromatograms of purified TBA-A nat and TBA-T nat. See experimental section for details.

**A-TBA-T** A<sub>0</sub>5'-5'G<sub>1</sub>G<sub>2</sub>T<sub>3</sub>T<sub>4</sub>G<sub>5</sub>G<sub>6</sub>T<sub>7</sub>G<sub>8</sub>T<sub>9</sub>G<sub>10</sub>G<sub>11</sub>T<sub>12</sub>T<sub>13</sub>G<sub>14</sub>G<sub>15</sub>3'-3'T<sub>16</sub>

|                        | H8/H6 | H1'  | H2'/H2''  | H3'  | H4'  | H5'/H5''  | CH <sub>3</sub> /H2 |
|------------------------|-------|------|-----------|------|------|-----------|---------------------|
| A <sub>0</sub>         | 8.10  | 6.23 | 2.43      | 4.52 | 4.45 | 4.07/4.00 | 7.81                |
| <u>G</u> <sub>1</sub>  | 7.19  | 5.91 | 2.83/3.44 | 4.90 | -    | 4.39/4.24 |                     |
| G <sub>2</sub>         | 8.21  | 5.99 | 2.28/3.00 | 5.10 | 4.86 | 4.39/4.24 |                     |
| T <sub>3</sub>         | 7.86  | 6.14 | 2.20/2.56 | 4.87 | -    | 4.28/4.22 | 1.95                |
| T <sub>4</sub>         | 7.08  | 5.99 | 1.97/2.64 | 4.85 | 4.24 | 4.17/3.87 | 0.95                |
| <u>G</u> <sub>5</sub>  | 7.38  | 5.98 | 2.84/3.27 | 4.82 | 4.39 | 4.22/4.18 |                     |
| G <sub>6</sub>         | 7.58  | 5.81 | 2.47/2.60 | 5.05 | 4.38 | 4.08      |                     |
| T <sub>7</sub>         | 7.89  | 6.45 | 2.46/2.58 | 4.85 | 4.45 | 4.26/4.20 | 1.95                |
| G <sub>8</sub>         | 7.69  | 5.71 | 2.25/2.36 | 4.77 | 4.46 | 4.08/4.02 |                     |
| T <sub>9</sub>         | 7.24  | 5.93 | 1.99/2.38 | 4.62 | 4.02 | 3.83/3.63 | 1.72                |
| <u>G</u> <sub>10</sub> | 7.40  | 6.00 | 2.86/3.62 | -    | 4.39 | 4.28/4.24 |                     |
| G <sub>11</sub>        | 8.22  | 6.00 | 2.28/2.97 | 5.10 | 4.38 | -         |                     |
| T <sub>12</sub>        | 7.86  | 6.14 | 2.20/2.56 | 4.87 | -    | 4.28/4.22 | 1.95                |
| T <sub>13</sub>        | 7.14  | 6.03 | 2.01/2.68 | 4.86 | 4.25 | 4.19/3.88 | 0.95                |
| <u>G</u> <sub>14</sub> | 7.44  | 6.06 | 2.97/3.42 | -    | 4.44 | 4.27/4.20 |                     |
| G <sub>15</sub>        | 8.05  | 6.01 | 2.64/2.70 | 5.09 | 4.30 | -         |                     |
| T <sub>16</sub>        | 7.59  | 6.27 | 2.50/2.65 | 4.92 | 4.18 | 3.79      | 1.67                |

| <b>TBA-G</b> 5'G <sub>1</sub> G <sub>2</sub> T <sub>3</sub> T <sub>4</sub> G <sub>5</sub> G <sub>6</sub> T <sub>7</sub> G <sub>8</sub> T <sub>9</sub> G <sub>10</sub> G <sub>11</sub> T <sub>12</sub> T <sub>13</sub> G <sub>14</sub> G <sub>15</sub> 3'-3'G <sub>16</sub> |       |      |           |      |      |           |                 |
|----------------------------------------------------------------------------------------------------------------------------------------------------------------------------------------------------------------------------------------------------------------------------|-------|------|-----------|------|------|-----------|-----------------|
|                                                                                                                                                                                                                                                                            | H8/H6 | H1'  | H2'/H2''  | H3'  | H4'  | H5'/H5''  | CH <sub>3</sub> |
| <u>G</u> <sub>1</sub>                                                                                                                                                                                                                                                      | 7.35  | 6.04 | 2.90      | 4.92 | 4.40 | 4.25      |                 |
| G <sub>2</sub>                                                                                                                                                                                                                                                             | 8.16  | 6.05 | 2.36      | 5.15 | -    | -         |                 |
| T <sub>3</sub>                                                                                                                                                                                                                                                             | 7.83  | 6.18 | 2.19/2.56 | 4.90 | 4.29 | 4.22      | 1.95            |
| T <sub>4</sub>                                                                                                                                                                                                                                                             | 7.12  | 6.03 | 2.06/2.61 | 4.88 | -    | 4.17/3.91 | 1.01            |
| <u>G</u> <sub>5</sub>                                                                                                                                                                                                                                                      | 7.41  | 6.00 | 2.85/3.39 | 4.87 | 4.27 | -         |                 |
| G <sub>6</sub>                                                                                                                                                                                                                                                             | 7.76  | 5.93 | 2.58/2.70 | 5.08 | 4.51 | 4.21      |                 |
| T <sub>7</sub>                                                                                                                                                                                                                                                             | 7.76  | 6.34 | 2.43/2.58 | 4.84 | 4.42 | 4.21      | 1.94            |
| G <sub>8</sub>                                                                                                                                                                                                                                                             | 7.58  | 5.70 | 2.04/2.37 | 4.73 | -    | 4.10      |                 |
| T <sub>9</sub>                                                                                                                                                                                                                                                             | 7.27  | 6.04 | 2.05/2.26 | 4.63 | 3.62 | 3.52/3.13 | 1.38            |
| <u>G</u> <sub>10</sub>                                                                                                                                                                                                                                                     | 7.45  | 6.02 | 2.91/3.53 | 4.92 | 4.40 | 4.27      |                 |
| G <sub>11</sub>                                                                                                                                                                                                                                                            | 8.21  | 6.03 | 2.35/3.01 | 5.14 | 4.40 | -         |                 |
| T <sub>12</sub>                                                                                                                                                                                                                                                            | 7.85  | 6.18 | 2.20/2.56 | 4.89 | 4.29 | 4.22      | 1.97            |
| T <sub>13</sub>                                                                                                                                                                                                                                                            | 7.14  | 6.05 | 2.07/2.66 | 4.89 | -    | 4.20/3.91 | 1.00            |
| <u>G</u> <sub>14</sub>                                                                                                                                                                                                                                                     | 7.46  | 6.06 | 2.99/3.51 | 4.92 | 4.27 | -         |                 |
| G <sub>15</sub>                                                                                                                                                                                                                                                            | 8.16  | 6.05 | 2.63/2.73 | 4.98 | 4.36 | -         |                 |
| G <sub>16</sub>                                                                                                                                                                                                                                                            | 7.82  | 6.05 | 2.82/2.95 | 5.04 | 4.29 | 3.77      |                 |

| <b>TBA-C</b> 5'G <sub>1</sub> G <sub>2</sub> T <sub>3</sub> T <sub>4</sub> G <sub>5</sub> G <sub>6</sub> T <sub>7</sub> G <sub>8</sub> T <sub>9</sub> G <sub>10</sub> G <sub>11</sub> T <sub>12</sub> T <sub>13</sub> G <sub>14</sub> G <sub>15</sub> 3'-3'C <sub>16</sub> |       |      |           |      |     |          |                     |
|----------------------------------------------------------------------------------------------------------------------------------------------------------------------------------------------------------------------------------------------------------------------------|-------|------|-----------|------|-----|----------|---------------------|
|                                                                                                                                                                                                                                                                            | H8/H6 | H1'  | H2'/H2''  | H3'  | H4' | H5'/H5'' | CH <sub>3</sub> /H5 |
| <u>G</u> <sub>1</sub>                                                                                                                                                                                                                                                      | 7.31  | 5.97 | 2.88      | 4.94 | -   | -        |                     |
| G <sub>2</sub>                                                                                                                                                                                                                                                             | 8.09  | 5.96 | 2.29/2.94 | 5.08 | -   | -        |                     |
| T <sub>3</sub>                                                                                                                                                                                                                                                             | 7.79  | 6.13 | 2.14/2.49 | -    | -   | -        | 1.91                |
| T <sub>4</sub>                                                                                                                                                                                                                                                             | 7.09  | 5.96 | 1.99/2.55 | -    | -   | -        | 0.98                |
| <u>G</u> <sub>5</sub>                                                                                                                                                                                                                                                      | 7.38  | 5.96 | 2.83/3.35 | 4.82 | -   | -        |                     |
| G <sub>6</sub>                                                                                                                                                                                                                                                             | 7.72  | 5.95 | 2.53/2.72 | 5.06 | -   | -        |                     |
| T <sub>7</sub>                                                                                                                                                                                                                                                             | 7.75  | 6.35 | 2.42/2.52 | -    | -   | -        | 1.90                |
| G <sub>8</sub>                                                                                                                                                                                                                                                             | 7.27  | 5.59 | 1.86/2.32 | 4.67 | -   | -        |                     |
| T <sub>9</sub>                                                                                                                                                                                                                                                             | 7.16  | 5.86 | 2.25/2.32 | -    | -   | -        | 1.40                |
| <u>G</u> <sub>10</sub>                                                                                                                                                                                                                                                     | 7.39  | 5.97 | 2.84/3.55 | 4.86 | -   | -        |                     |
| G <sub>11</sub>                                                                                                                                                                                                                                                            | 8.12  | 5.96 | 2.27/2.90 | 5.08 | -   | -        |                     |
| T <sub>12</sub>                                                                                                                                                                                                                                                            | 7.79  | 6.13 | 2.14/2.49 | -    | -   | -        | 1.91                |
| T <sub>13</sub>                                                                                                                                                                                                                                                            | 7.13  | 5.96 | 2.02/2.62 | 4.84 | -   | -        | 0.95                |
| <u>G</u> <sub>14</sub>                                                                                                                                                                                                                                                     | 7.43  | 6.01 | 2.91/3.45 | 4.87 | -   | -        |                     |
| G <sub>15</sub>                                                                                                                                                                                                                                                            | 8.04  | 6.06 | 2.41/2.65 | 5.01 | -   | -        |                     |
| C <sub>16</sub>                                                                                                                                                                                                                                                            | 7.68  | 6.13 | 2.38/2.56 | -    | -   | -        | 5.85                |

| <b>TBA-A</b> 5' <u>G</u> <sub>1</sub> G <sub>2</sub> T <sub>3</sub> T <sub>4</sub> G <sub>5</sub> G <sub>6</sub> T <sub>7</sub> G <sub>8</sub> T <sub>9</sub> G <sub>10</sub> G <sub>11</sub> T <sub>12</sub> T <sub>13</sub> G <sub>14</sub> G <sub>15</sub> 3'-3'A <sub>16</sub> |       |      |           |      |      |           |                     |
|------------------------------------------------------------------------------------------------------------------------------------------------------------------------------------------------------------------------------------------------------------------------------------|-------|------|-----------|------|------|-----------|---------------------|
|                                                                                                                                                                                                                                                                                    | H8/H6 | H1'  | H2'/H2''  | H3'  | H4'  | H5'/H5''  | CH <sub>3</sub> /H2 |
| <u>G</u> <sub>1</sub>                                                                                                                                                                                                                                                              | 7.20  | 6.05 | 2.80/2.94 | 5.01 | 4.24 | 4.00      |                     |
| G <sub>2</sub>                                                                                                                                                                                                                                                                     | 8.12  | 5.96 | 2.01/2.31 | 5.12 | -    | -         |                     |
| T <sub>3</sub>                                                                                                                                                                                                                                                                     | 7.82  | 6.17 | 2.17/2.31 | 4.87 | -    | 4.26/4.21 | 1.94                |
| T <sub>4</sub>                                                                                                                                                                                                                                                                     | 7.09  | 6.00 | 2.00/2.57 | 4.86 | 4.25 | 4.16/3.89 | 0.98                |
| <u>G</u> <sub>5</sub>                                                                                                                                                                                                                                                              | 7.44  | 5.98 | 2.79/3.31 | 4.84 | 4.48 | 4.22      |                     |
| G <sub>6</sub>                                                                                                                                                                                                                                                                     | 7.84  | 6.10 | 2.52/2.79 | 5.12 | -    | -         |                     |
| T <sub>7</sub>                                                                                                                                                                                                                                                                     | 7.62  | 6.32 | 2.52/2.56 | 4.85 | 4.26 | 4.20/4.14 | 1.92                |
| G <sub>8</sub>                                                                                                                                                                                                                                                                     | 7.51  | 6.11 | 2.52      | 5.23 | 4.44 | 4.15      |                     |
| T <sub>9</sub>                                                                                                                                                                                                                                                                     | 7.01  | 6.07 | 1.87/2.10 | 5.24 | 4.47 | 3.45/3.35 | 0.83                |
| <u>G</u> <sub>10</sub>                                                                                                                                                                                                                                                             | 7.48  | 6.05 | 2.91/3.71 | 5.11 | 4.92 | 4.41      |                     |
| G <sub>11</sub>                                                                                                                                                                                                                                                                    | 8.26  | 6.07 | 2.35/3.04 | 5.14 | -    | -         |                     |
| T <sub>12</sub>                                                                                                                                                                                                                                                                    | 7.87  | 6.18 | 2.23/2.59 | 4.90 | 4.29 | 4.23      | 1.97                |
| T <sub>13</sub>                                                                                                                                                                                                                                                                    | 7.07  | 6.00 | 2.02/2.64 | 4.89 | 4.27 | 4.19/3.91 | 1.00                |
| <u>G</u> <sub>14</sub>                                                                                                                                                                                                                                                             | 7.50  | 6.13 | 3.04/3.51 | 4.91 | 4.30 | -         |                     |
| G <sub>15</sub>                                                                                                                                                                                                                                                                    | 8.21  | 6.16 | 2.67/2.86 | 5.05 | -    | 4.30/4.21 |                     |
| A <sub>16</sub>                                                                                                                                                                                                                                                                    | 8.33  | 6.21 | 2.91/2.97 | 5.11 | -    | -         | 7.78                |

| <b>TBA-T</b>          | 5'G <sub>1</sub> G <sub>2</sub> T <sub>3</sub> T <sub>4</sub> G <sub>5</sub> G <sub>6</sub> T <sub>7</sub> G <sub>8</sub> T <sub>9</sub> G <sub>10</sub> G <sub>11</sub> T <sub>12</sub> T <sub>13</sub> G <sub>14</sub> G <sub>15</sub> 3'-3'T <sub>16</sub> |      |           |      |      |           |                 |
|-----------------------|---------------------------------------------------------------------------------------------------------------------------------------------------------------------------------------------------------------------------------------------------------------|------|-----------|------|------|-----------|-----------------|
|                       | H8/H6                                                                                                                                                                                                                                                         | H1'  | H2'/H2''  | H3'  | H4'  | H5'/H5''  | CH <sub>3</sub> |
| <u>G<sub>1</sub></u>  | 7.37                                                                                                                                                                                                                                                          | 6.02 | 2.88/2.95 | 5.00 | 4.40 | 4.25/4.03 |                 |
| G <sub>2</sub>        | 8.15                                                                                                                                                                                                                                                          | 6.02 | 2.33/2.99 | 5.13 | -    | 4.25      |                 |
| T <sub>3</sub>        | 7.84                                                                                                                                                                                                                                                          | 6.20 | 2.18/2.55 | 4.89 | -    | 4.27/4.19 | 1.95            |
| T <sub>4</sub>        | 7.13                                                                                                                                                                                                                                                          | 6.03 | 2.04/2.61 | 4.87 | 4.47 | 4.17/3.90 | 1.02            |
| <u>G<sub>5</sub></u>  | 7.41                                                                                                                                                                                                                                                          | 5.98 | 2.83/3.35 | 4.85 | 4.40 | 4.22      |                 |
| G <sub>6</sub>        | 7.69                                                                                                                                                                                                                                                          | 5.91 | 2.52/2.71 | 5.09 | -    | 4.22      |                 |
| T <sub>7</sub>        | 7.84                                                                                                                                                                                                                                                          | 6.43 | 2.48/2.60 | 4.86 | -    | -         | 1.96            |
| G <sub>8</sub>        | 7.55                                                                                                                                                                                                                                                          | 5.70 | 2.07/2.31 | 4.73 | 4.41 | 4.21/4.07 |                 |
| T <sub>9</sub>        | 7.22                                                                                                                                                                                                                                                          | 5.96 | 1.94/2.31 | 4.61 | -    | 3.68/3.57 | 1.59            |
| <u>G<sub>10</sub></u> | 7.44                                                                                                                                                                                                                                                          | 6.01 | 2.88/3.60 | 4.90 | 4.39 | 4.27/4.11 |                 |
| G <sub>11</sub>       | 8.20                                                                                                                                                                                                                                                          | 6.02 | 2.32/2.97 | 5.12 | -    | 4.28      |                 |
| T <sub>12</sub>       | 7.85                                                                                                                                                                                                                                                          | 6.17 | 2.19/2.56 | 4.89 | 4.47 | 4.27/4.19 | 1.96            |
| T <sub>13</sub>       | 7.16                                                                                                                                                                                                                                                          | 6.06 | 2.05/2.67 | 4.88 | 4.47 | 4.19/3.90 | 0.98            |
| <u>G<sub>14</sub></u> | 7.48                                                                                                                                                                                                                                                          | 6.07 | 2.97/3.48 | 4.91 | 4.48 | 4.27/4.21 |                 |
| G <sub>15</sub>       | 8.07                                                                                                                                                                                                                                                          | 6.06 | 2.61/2.70 | 5.10 | 4.48 | 4.27/4.22 |                 |
| T <sub>16</sub>       | 7.59                                                                                                                                                                                                                                                          | 6.28 | 2.44/2.67 | 4.90 | 4.19 | 3.77      | 1.72            |

**Table S1. Proton chemical shifts assignment for G-quadruplex structures formed by ODNs A-TBA-T, TBA-G, TBA-C, TBA-A, TBA-T (700 MHz; 25°C) in PBS buffer solution (H<sub>2</sub>O/D<sub>2</sub>O 9:1) and 0.2 mM EDTA (pH 7.0). Deoxyguanosines adopting *syn* glycosidic conformation are underlined. The hypens indicate values not determined.**

| Names | $T_m$ (°C)<br>( $\pm 1$ ) | $\Delta T_m$ (°C) | $\Delta H_{v.H.}$<br>(kJ/mol) <sup>a</sup> | $\Delta S_{v.H.}$<br>(kJ/mol K) <sup>a</sup> |
|-------|---------------------------|-------------------|--------------------------------------------|----------------------------------------------|
| TBA   | 50                        | -                 | 154                                        | 0.48                                         |
| TBA-A | 59                        | +9                | 194                                        | 0.58                                         |
| TBA-T | 56                        | +6                | 174                                        | 0.53                                         |
| TBA-G | 52                        | +2                | 175                                        | 0.54                                         |
| TBA-C | 53                        | +3                | 172                                        | 0.53                                         |

<sup>a</sup> The errors on  $\Delta H_{v.H.}$  and  $\Delta S_{v.H.}$  are within the 10 %.

**Table S2.** Thermodynamic parameters of some modified aptamers and their natural counterpart (TBA) in potassium buffer obtained from the van't Hoff analysis of the CD melting curves (see text for details).
